# Supplementary material for: Improving the Efficacy of Conventional Therapy by Adding Andrographolide Sulfonate in the Treatment of Severe Hand, Foot, and Mouth Disease: A Randomized Controlled Trial
Source: Evid Based Complement Alternat Med. 2013 Jan 15;2013:316250. doi: 10.1155/2013/316250 (PMC3557643; doi:10.1155/2013/316250)
Supplement: Supplementary file 1 — Body temperature changes among patients who received Andrographolide Sulfonate combination therapy (solid line) versus patients who received conventional therapy (dotted line) from baseline to 7 days after treatment. [file 316250.f1.xls]

## Sheet: Sheet1
8AM		37.51	0.91	38.07	1.08
		37.46	0.91	37.7	0.84
12AM		37.46	0.72	37.48	0.65
		37.5	0.67	37.71	0.71
16PM	Day 1	37.47	0.7	37.44	0.54
		37.38	0.65	37.32	0.56
20PM		37.32	0.67	37.18	0.54
		37.33	0.65	37.13	0.59
24PM		37.25	0.63	37.02	0.59
8AM		37.43	0.57	37.3	0.66
		37.32	0.52	37.16	0.61
12AM		37.38	0.52	37.14	0.51
		37.48	0.55	37.2	0.51
16PM	Day 2	37.34	0.52	37.07	0.48
		37.22	0.48	36.95	0.46
20PM		37.19	0.49	36.87	0.43
		37.18	0.5	36.83	0.51
24PM		37.12	0.47	36.77	0.49
8AM		37.35	0.69	37.08	0.52
		37.22	0.61	36.96	0.47
12AM		37.25	0.55	37.01	0.43
		37.39	0.53	37.07	0.4
16PM	Day 3	37.28	0.5	36.92	0.43
		37.11	0.47	36.86	0.39
20PM		37.04	0.46	36.77	0.43
		37.01	0.45	36.73	0.45
24PM		36.99	0.46	36.67	0.49
8AM		36.97	0.45	36.88	0.44
		36.91	0.49	36.81	0.43
12AM		37.03	0.46	36.89	0.45
		37.13	0.45	36.94	0.37
16PM	Day 4	37.03	0.45	36.86	0.41
		36.92	0.42	36.78	0.41
20PM		36.93	0.41	36.69	0.34
		36.9	0.39	36.62	0.37
24PM		36.86	0.41	36.54	0.37
8AM		36.87	0.37	36.76	0.35
		36.81	0.39	36.72	0.37
12AM		37.09	0.42	36.87	0.37
		37.03	0.41	36.8	0.38
16PM	Day 5	36.88	0.29	36.71	0.34
		36.83	0.32	36.63	0.35
20PM		36.82	0.33	36.57	0.36
		36.79	0.35	36.53	0.33
24PM		36.8	0.11	36.6	0.14
8AM		36.82	0.29	36.69	0.33
		36.82	0.36	36.66	0.34
12AM		36.9	0.35	36.72	0.36
		37.06	0.39	36.87	0.37
16PM	Day 6	36.99	0.33	36.75	0.37
		36.89	0.32	36.7	0.33
20PM		36.87	0.29	36.6	0.31
		36.84	0.31	36.55	0.36
24PM		36.82	0.31	36.51	0.36
8AM		36.76	0.25	36.69	0.26
		36.75	0.33	36.71	0.28
12AM		36.85	0.35	36.76	0.31
		37.04	0.41	36.92	0.37
16PM	Day 7	36.96	0.39	36.81	0.32
		36.9	0.36	36.74	0.32
20PM		36.83	0.35	36.74	0.36
		36.82	0.26	36.68	0.35
24PM		36.8	0.32	36.65	0.36
